# Supplementary material for: A Comparative Study of Two-way and Offline Coupled WRF v3.4 and CMAQ v5.0.2 over the Contiguous U.S.: Performance Evaluation and Impacts of Chemistry-Meteorology Feedbacks on Air Quality
Source: Copernicus journal article supplement (doi:10.5194/gmd-2020-218), 2020-09-03
Supplement: Supplementary file 1 [file gmd-2020-218-supplement.pdf]

## Supplementary Materials

### **A Comparative Study of Two-way and Offline Coupled WRF v3.4 and CMAQ v5.0.2 over the Contiguous U.S.: Performance Evaluation and Impacts of Chemistry-Meteorology Feedbacks on Air Quality**

Kai Wang<sup>1</sup>, Yang Zhang<sup>1\*</sup>, Shaocai Yu<sup>2\*</sup>, David C. Wong<sup>3</sup>, Jonathan Pleim<sup>3</sup>, Rohit Mathur<sup>3</sup>,  
James T. Kelly<sup>4</sup>, and Michelle Bell<sup>5</sup>

<sup>1</sup>Department of Civil and Environmental Engineering, Northeastern University, Boston, MA  
02115

<sup>2</sup>Key Laboratory of Environmental Remediation and Ecological Health, Ministry of Education;  
Research Center for Air Pollution and Health, College of Environment and Resource Sciences,  
Zhejiang University, Hangzhou, Zhejiang 310058, P.R. China

<sup>3</sup>Center for Environmental  
Measurement and Modeling, U.S. EPA, RTP, NC 27711

<sup>4</sup>Office of Air Quality Planning and Standards, U.S. EPA, RTP, NC 27711

<sup>5</sup>School of Forestry & Environmental Studies, Yale University, New Haven, CT 06511

*\*Correspondence to:* Yang Zhang (ya.zhang@northeastern.edu); Shaocai Yu (shaocaiyu@zju.edu.cn)

Table S1. The model configurations of the two-way WRF-CMAQ simulation.

| <b>Attributes</b>                     | <b>Model Configurations</b>                                                                                                                                                                                                                     |
|---------------------------------------|-------------------------------------------------------------------------------------------------------------------------------------------------------------------------------------------------------------------------------------------------|
| Model                                 | WRF v3.4-CMAQ v5.0.2                                                                                                                                                                                                                            |
| Simulation period                     | 2008-2012                                                                                                                                                                                                                                       |
| Domain                                | CONUS                                                                                                                                                                                                                                           |
| Horizontal grid spacing               | 36-km (148 × 112 grid cells)                                                                                                                                                                                                                    |
| Vertical grid                         | 34 layers from surface to 100 hPa                                                                                                                                                                                                               |
| Physical options                      |                                                                                                                                                                                                                                                 |
| Shortwave radiation                   | Rapid and accurate Radiative Transfer Model for GCM (RRTMG)                                                                                                                                                                                     |
| Longwave radiation                    | RRTMG                                                                                                                                                                                                                                           |
| PBL                                   | ACM2                                                                                                                                                                                                                                            |
| Land surface                          | Pleim-Xiu                                                                                                                                                                                                                                       |
| Microphysics                          | Morrison two-moment                                                                                                                                                                                                                             |
| Cumulus                               | Kain-Fritsch                                                                                                                                                                                                                                    |
| Aerosol activation                    | Abdul-Razzak and Ghan                                                                                                                                                                                                                           |
| Chemical options                      |                                                                                                                                                                                                                                                 |
| Gas-phase chemistry                   | CB05 with updated chlorine chemistry                                                                                                                                                                                                            |
| Aerosol module                        | AERO6                                                                                                                                                                                                                                           |
| Photolysis                            | CMAQ inline                                                                                                                                                                                                                                     |
| Aqueous-phase chemistry               | AQ chemistry module (AQCHEM)                                                                                                                                                                                                                    |
| Meteorological and chemical IC and BC | Downscaled from the modified Community Earth System Model/Community Atmosphere Model (CESM/CAM5) v1.2.2; Meteorological ICs/BCs bias-corrected with National Center for Environmental Protection's Final (FNL) Operational Global Analysis data |
| Anthropogenic emission                | NEI 2008 updated to 2010, and NEI 2011                                                                                                                                                                                                          |
| Biogenic emission                     | BEIS3                                                                                                                                                                                                                                           |
| Dust emission                         | CMAQ inline                                                                                                                                                                                                                                     |
| Sea-salt emission                     | CMAQ inline                                                                                                                                                                                                                                     |

Table S2 summarizes the observational databases and the variables evaluated in this work. For evaluation of chemical concentrations and meteorological variables, the surface networks include the National Climatic Data Center (NCDC) Quality Controlled Local Climatological Data (QCLCD), Clean Air Status and Trends Network (CASTNET), the Aerometric Information Retrieval System (AIRS) – Air Quality System (AQS), the Interagency Monitoring of Protected Visual Environments (IMPROVE), the Chemical Speciation Network (CSN), the Southeastern Aerosol Research and Characterization (SEARCH), and the National Atmospheric Deposition Network (NADP). Several aerosol-cloud-radiation variables are also evaluated against satellite retrievals including the Clouds and the Earth’s Radiant Energy System (CERES) and the Moderate Resolution Imaging Spectroradiometer (MODIS).

NCDC QCLCD data contains data over 700 U.S. locations from July 1996 to December 2004, and over 1600 locations from 2005 onwards (<http://www.ncdc.noaa.gov/data-access/land-based-station-data/land-based-datasets/quality-controlled-local-climatological-data-qclcd>). CASTNET observations have been collected in a range of rural environments, from desert to agricultural locations, and from flat to complex terrains ([http://java.epa.gov/castnet/epa\\_jsp/sites.jsp](http://java.epa.gov/castnet/epa_jsp/sites.jsp)). It contains measurement data for meteorological variables and chemical concentrations. AIRS-AQS is the U.S. EPA’s repository for ambient air quality data from over 5000 active monitors (<http://www.epa.gov/ttn/airs/airsaqs/>). While IMPROVE observations have been collected in protected visual environments, i.e., in National Parks and Wilderness Areas (<http://vista.cira.colostate.edu/improve/>), CSN sites are located in a range of locations from urban to rural areas (<http://www.epa.gov/ttnamti1/specgen.html>). Both networks contain data for PM<sub>2.5</sub> and major PM<sub>2.5</sub> species. NADP contains precipitation data from rain gauges.

The MODIS satellite retrievals for AOD (Remer et al., 2005), CF, COT, and CWP come from the level 3 MODIS gridded atmosphere monthly global joint product (MOD08\_M3) collected from the Terra platform ([http://modis-atmos.gsfc.nasa.gov/MOD08\\_M3/](http://modis-atmos.gsfc.nasa.gov/MOD08_M3/)). The CDNC data used in this study are derived from MODIS by Bennartz (2007).

Table S2. Observational datasets and variables evaluated in this study.

| <b>Gases and PM Species</b>   |                                                                                                                          |                                                   |                                      |
|-------------------------------|--------------------------------------------------------------------------------------------------------------------------|---------------------------------------------------|--------------------------------------|
| <b>Observational database</b> | <b>Variables evaluated</b>                                                                                               | <b>Sampling Frequency</b>                         | <b>Number of Sites</b>               |
| CASTNET                       | Max 1-hr and 8-hr O <sub>3</sub>                                                                                         | Daily for O <sub>3</sub>                          | ~90                                  |
| AIRS–AQS                      | O <sub>3</sub>                                                                                                           | Hourly                                            | ~1150                                |
| IMPROVE                       | PM <sub>2.5</sub> , SO <sub>4</sub> <sup>2-</sup> , NO <sub>3</sub> <sup>-</sup> , NH <sub>4</sub> <sup>+</sup> , EC, OC | 24-hour data. Data availability once every 3 days | ~160                                 |
| CSN                           | PM <sub>2.5</sub> , SO <sub>4</sub> <sup>2-</sup> , NO <sub>3</sub> <sup>-</sup> , NH <sub>4</sub> <sup>+</sup> , EC, TC | 24-hour data. Data availability once every 3 days | ~200                                 |
| <b>Meteorology</b>            |                                                                                                                          |                                                   |                                      |
| <i>Observational Database</i> | <i>Variables evaluated</i>                                                                                               | <i>Temporal Resolution</i>                        | <i>Spatial Resolution</i>            |
| NCDC QCLCD                    | T2, RH, WS10, WD10                                                                                                       | Hourly                                            | ~700 before 2005<br>~1600 after 2005 |

|                                                    |                                |                            |                                            |
|----------------------------------------------------|--------------------------------|----------------------------|--------------------------------------------|
| NADP                                               | Precipitation                  | Weekly                     | 255                                        |
| <b>Radiation and other Aerosol/Cloud variables</b> |                                |                            |                                            |
| <i>Observational Database/ Satellite</i>           | <i>Variables evaluated</i>     | <i>Temporal Resolution</i> | <i>Number of sites/ Spatial Resolution</i> |
| CERES                                              | SWDOWN                         | Monthly                    | 1° × 1°                                    |
| MODIS                                              | AOD, CF, COT, CWP, QVAPOR, CCN | Monthly                    | 1° × 1°                                    |
| MODIS derived based on Bennartz (2007)             | CDNC                           | Monthly                    | 1° × 1°                                    |

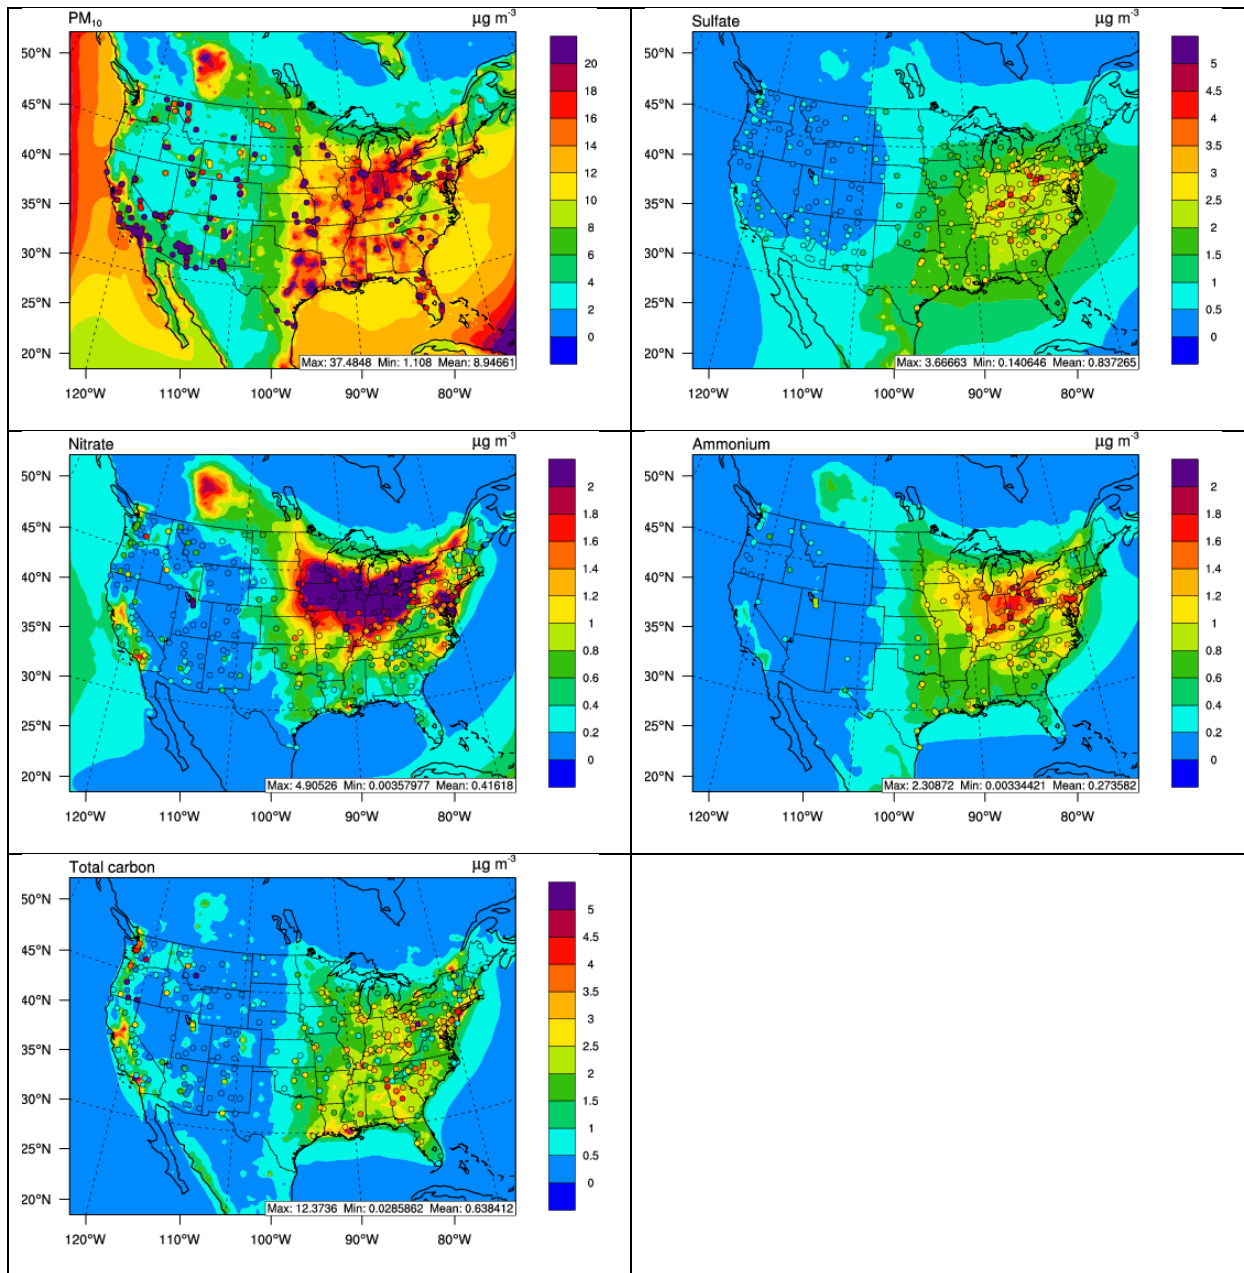

Figure S1. Spatial distributions of 5-year averaged daily PM<sub>10</sub> and PM<sub>2.5</sub> constituents overlaid with observations.
